# Supplementary material for: The Upstream 1350~1250 Nucleotide Sequences of the Human ENDOU-1 Gene Contain Critical Cis-Elements Responsible for Upregulating Its Transcription during ER Stress
Source: MDPI journal article supplement (doi:10.3390/ijms242417393), 2023-12-12
Supplement: s1 [file s1]

Table S1: TFsitedscan transcription factor binding sites prediction results

|                            | Site (Length) | PositionScore (Gaps) | Occurrence | EA Probability |
|----------------------------|---------------|----------------------|------------|----------------|
| EKLF_CS' (9)               | 26            | 7 ( 0)               | 0          | 2.87e-01       |
| c-Myb-pseudorabies         |               |                      |            |                |
| SREBP-1_CS' (9)            | 54            | 7 ( 0)               | 0          | 1.44e-01       |
| C/EBP-beta_CS' (9)         | 88            | 7 ( 0)               | 0          | 2.87e-01       |
| PAUSE-1_CS2 (15)           | 137           | 10 ( 0)              | 0          | 1.00e00        |
| CNTF_response_eleme        |               |                      |            |                |
| JCV-B-1' (11)              | 159           | 10 ( 0)              | 0          | 1.00e00        |
| MAZ-PTHR (9)               | 163           | 9 ( 0)               | 0          | 4.49e-03       |
| MAZ_CS2 (8)                | 164           | 7 ( 0)               | 0          | 7.18e-02       |
| Sp1-alp-inhibitor_(5' (11) | 164           | 10 ( 0)              | 0          | 1.00e00        |
| MAZ_CS2' (8)               | 168           | 7 ( 0)               | 0          | 7.18e-02       |
| MAZ_CS2 (8)                | 168           | 7 ( 0)               | 0          | 7.18e-02       |
| CTF/NF1-CF1-2 (11)         | 183           | 10 ( 0)              | 0          | 1.00e00        |
| Yi-consensus' (10)         | 188           | 7 ( 0)               | 0          | 2.87e-01       |
| apoE-PET' (12)             | 188           | 12 ( 0)              | 0          | 7.02e-05       |
| APOE-PET (10)              | 190           | 10 ( 0)              | 0          | 1.12e-03       |
| apoE-B1-II' (9)            | 190           | 9 ( 0)               | 0          | 4.49e-03       |
| ApoE_B1' (9)               | 190           | 8 ( 0)               | 0          | 8.98e-03       |
| APRT-human_US' (8)         | 192           | 8 ( 0)               | 0          | 1.80e-02       |
| APRT-CHO_US' (8)           | 192           | 8 ( 0)               | 0          | 1.80e-02       |
| ZFX-HLA-A11-1' (9)         | 194           | 9 ( 0)               | 0          | 4.49e-03       |
| Yi-consensus' (10)         | 215           | 7 ( 0)               | 0          | 2.87e-01       |
| AP-2_beta_CS' (9)          | 216           | 6 ( 0)               | 0          | 5.75e-01       |
| AP1-ET-I (8)               | 228           | 8 ( 0)               | 0          | 1.80e-02       |
| AP-1_CS1 (8)               | 228           | 7 ( 0)               | 0          | 7.18e-02       |
| claudin-CdxB' (11)         | 285           | 10 ( 0)              | 0          | 1.00e00        |
| Rev-erb-alpha-CS (12)      | 291           | 10 ( 0)              | 0          | 1.12e-03       |
| ROR-alpha-2_CS (12)        | 291           | 10 ( 0)              | 0          | 1.00e00        |
| Rev-ErbAalpha_CS (11)      | 292           | 9 ( 0)               | 0          | 1.00e00        |
| E2_RS1' (12)               | 316           | 8 ( 0)               | 0          | 2.87e-01       |
| E2_RS1 (12)                | 316           | 8 ( 0)               | 0          | 2.87e-01       |
| BPV-E2_CS2' (12)           | 316           | 8 ( 0)               | 0          | 2.87e-01       |
| BPV-E2_CS2 (12)            | 316           | 8 ( 0)               | 0          | 2.87e-01       |
| TFII-I-fos-SRE (11)        | 347           | 10 ( 0)              | 0          | 1.00e00        |
| ANF-SRE/406' (12)          | 348           | 11 ( 0)              | 0          | 2.94e-01       |
| PAI-2-TRM' (11)            | 356           | 10 ( 0)              | 0          | 1.00e00        |

|                        |     |         |   |          |
|------------------------|-----|---------|---|----------|
| AP-2_beta_CS (9)       | 363 | 6 ( 0)  | 0 | 5.75e-01 |
| ssT1_CS (12)           | 376 | 8 ( 0)  | 0 | 1.44e-01 |
| proximal_region/_A (8) | 394 | 8 ( 0)  | 0 | 1.80e-02 |
| AP1-TGF-beta1.2' (8)   | 412 | 8 ( 0)  | 0 | 1.80e-02 |
| TEF1-GTI* (9)          | 425 | 9 ( 0)  | 0 | 4.49e-03 |
| SiX5_CS (9)            | 458 | 7 ( 0)  | 0 | 7.18e-02 |
| CP2-consensus (11)     | 530 | 8 ( 0)  | 0 | 7.18e-02 |
| PuF_site (8)           | 540 | 8 ( 0)  | 0 | 1.80e-02 |
| IgHC.8' (8)            | 630 | 8 ( 0)  | 0 | 1.80e-02 |
| CuE3.1' (8)            | 630 | 8 ( 0)  | 0 | 1.80e-02 |
| GBP/GAS-pIRE' (11)     | 654 | 10 ( 0) | 0 | 1.00e00  |
| Oct-X_CS (9)           | 669 | 7 ( 0)  | 0 | 7.18e-02 |
| OTF-2A_RS (9)          | 669 | 9 ( 0)  | 0 | 4.49e-03 |
| OTF-1_RS (9)           | 669 | 9 ( 0)  | 0 | 4.49e-03 |
| Ig-dc.2' (10)          | 670 | 9 ( 0)  | 0 | 4.49e-03 |
| Ig-kappa.2' (8)        | 670 | 8 ( 0)  | 0 | 1.80e-02 |
| dc_element_CS' (10)    | 670 | 9 ( 0)  | 0 | 4.49e-03 |
| cd_element_CS (10)     | 670 | 9 ( 0)  | 0 | 4.49e-03 |
| Octa-U2snRNA (8)       | 670 | 8 ( 0)  | 0 | 1.80e-02 |
| NF-A2-IgkLc' (8)       | 670 | 8 ( 0)  | 0 | 1.80e-02 |
| NF-A1-IgkLc' (8)       | 670 | 8 ( 0)  | 0 | 1.80e-02 |
| IgNF-A-Igk' (8)        | 670 | 8 ( 0)  | 0 | 1.80e-02 |
| IgHC.16' (8)           | 670 | 8 ( 0)  | 0 | 1.80e-02 |
| IgNF-A-IgH_(1)' (8)    | 670 | 8 ( 0)  | 0 | 1.80e-02 |
| IgHC.15' (8)           | 670 | 8 ( 0)  | 0 | 1.80e-02 |
| IgHC.14' (8)           | 670 | 8 ( 0)  | 0 | 1.80e-02 |
| IgNF-A-IgH_(2) (8)     | 670 | 8 ( 0)  | 0 | 1.80e-02 |
| IgHC.2' (8)            | 670 | 8 ( 0)  | 0 | 1.80e-02 |
| NF-A2-IgHC' (8)        | 670 | 8 ( 0)  | 0 | 1.80e-02 |
| NF-A1-IgHC' (8)        | 670 | 8 ( 0)  | 0 | 1.80e-02 |
| IgHC.1' (8)            | 670 | 8 ( 0)  | 0 | 1.80e-02 |
| histone-H2B-US' (8)    | 670 | 8 ( 0)  | 0 | 1.80e-02 |
| dc_box.2' (10)         | 670 | 9 ( 0)  | 0 | 4.49e-03 |
| OCTA3 (8)              | 670 | 8 ( 0)  | 0 | 1.80e-02 |
| OCTA1.1' (8)           | 670 | 8 ( 0)  | 0 | 1.80e-02 |
| Ig_cd (10)             | 670 | 9 ( 0)  | 0 | 4.49e-03 |
| dc_box' (10)           | 670 | 9 ( 0)  | 0 | 2.24e-03 |
| HIF-1-guanylin' (11)   | 683 | 10 ( 0) | 0 | 1.00e00  |

|                           |      |         |   |           |
|---------------------------|------|---------|---|-----------|
| NF-E2-consensus_(1)' (8)  | 686  | 8 ( 0)  | 0 | 1. 80e-02 |
| AP1-TRE-4/C (9)           | 686  | 9 ( 0)  | 0 | 4. 49e-03 |
| NF-E2_CS2 (9)             | 687  | 8 ( 0)  | 0 | 1. 80e-02 |
| AP-1_CS2 (8)              | 687  | 8 ( 0)  | 0 | 1. 80e-02 |
| AP-2_beta_CS' (9)         | 694  | 6 ( 0)  | 0 | 5. 75e-01 |
| IL2-TCep (10)             | 700  | 10 ( 0) | 0 | 1. 12e-03 |
| Six5_CS (9)               | 714  | 7 ( 0)  | 0 | 7. 18e-02 |
| Sp1-GPC_(2)' (11)         | 731  | 10 ( 0) | 0 | 1. 00e00  |
| Sp1-KDR/flk-1-IV (11)     | 732  | 10 ( 0) | 0 | 1. 00e00  |
| Sp1-alpha-actin_(4)' (11) | 732  | 10 ( 0) | 0 | 1. 00e00  |
| KLF15-CS' (9)             | 733  | 7 ( 0)  | 0 | 7. 18e-02 |
| EKLF_CS' (9)              | 733  | 7 ( 0)  | 0 | 2. 87e-01 |
| KKLF_CS (9)               | 733  | 7 ( 0)  | 0 | 7. 18e-02 |
| MAZ_CS2' (8)              | 734  | 7 ( 0)  | 0 | 7. 18e-02 |
| MAZ_CS2 (8)               | 734  | 7 ( 0)  | 0 | 7. 18e-02 |
| AP-2_beta_CS' (9)         | 762  | 6 ( 0)  | 0 | 5. 75e-01 |
| AP-2_beta_CS (9)          | 762  | 6 ( 0)  | 0 | 5. 75e-01 |
| AP-2_site' (9)            | 762  | 7 ( 0)  | 0 | 2. 87e-01 |
| AP-2_site (9)             | 762  | 7 ( 0)  | 0 | 2. 87e-01 |
| Olf-1-consensus (11)      | 781  | 10 ( 0) | 0 | 2. 24e-03 |
| AP-2-p62_(2) (8)          | 790  | 8 ( 0)  | 0 | 1. 80e-02 |
| Ad5_EIA_element_I' (11)   | 799  | 10 ( 0) | 0 | 1. 00e00  |
| E1A_element_I. 2' (11)    | 799  | 10 ( 0) | 0 | 1. 00e00  |
| MyoD-PRR-M-CAT (8)        | 822  | 8 ( 0)  | 0 | 1. 80e-02 |
| KLF15-CS (9)              | 841  | 7 ( 0)  | 0 | 7. 18e-02 |
| MAZ_CS2' (8)              | 841  | 7 ( 0)  | 0 | 7. 18e-02 |
| KKLF_CS' (9)              | 841  | 7 ( 0)  | 0 | 7. 18e-02 |
| IRF-1/pIRE' (11)          | 911  | 10 ( 0) | 0 | 1. 00e00  |
| TTF-TP0-2' (8)            | 936  | 8 ( 0)  | 0 | 1. 80e-02 |
| T3R_TRE1_CS (8)           | 1064 | 7 ( 0)  | 0 | 7. 18e-02 |
| EKLF_CS' (9)              | 1072 | 7 ( 0)  | 0 | 2. 87e-01 |
| hIGFBP-1-HRE-2' (8)       | 1081 | 8 ( 0)  | 0 | 1. 80e-02 |
| CP1-gamma-globin_(3) (8)  | 1092 | 8 ( 0)  | 0 | 1. 80e-02 |
| PEA-3-TBXAS1 (8)          | 1119 | 8 ( 0)  | 0 | 1. 80e-02 |
| MDR1-HT-p53-site-1' (11)  | 1209 | 10 ( 0) | 0 | 1. 00e00  |
| MyoD_CS2' (9)             | 1233 | 7 ( 0)  | 0 | 1. 44e-01 |
| YY1_CS' (9)               | 1250 | 7 ( 0)  | 0 | 1. 44e-01 |
| ESE-3_CS (9)              | 1286 | 8 ( 0)  | 0 | 1. 80e-02 |

|                        |      |         |   |          |
|------------------------|------|---------|---|----------|
| Ets1-Fgf8 (8)          | 1312 | 8 ( 0)  | 0 | 1.80e-02 |
| c-Ets-2_CS' (8)        | 1312 | 7 ( 0)  | 0 | 7.18e-02 |
| AP-2_beta_CS' (9)      | 1341 | 6 ( 0)  | 0 | 5.75e-01 |
| AP-2_beta_CS (9)       | 1341 | 6 ( 0)  | 0 | 5.75e-01 |
| AP-1_CS1 (8)           | 1341 | 7 ( 0)  | 0 | 2.87e-01 |
| ApoB-site_g (8)        | 1358 | 8 ( 0)  | 0 | 1.80e-02 |
| PEA3_site_CS (8)       | 1360 | 7 ( 0)  | 0 | 3.59e-02 |
| TCF-2-alpha_CS (8)     | 1360 | 7 ( 0)  | 0 | 7.18e-02 |
| GABP_CS (8)            | 1361 | 7 ( 0)  | 0 | 3.59e-02 |
| Ad5_EIA_element_I (11) | 1361 | 10 ( 0) | 0 | 1.00e00  |
| E1A_element_I.2 (11)   | 1361 | 10 ( 0) | 0 | 1.00e00  |
| AP2-FGFR4' (11)        | 1417 | 10 ( 0) | 0 | 6.23e-01 |
| AluA' (13)             | 1483 | 13 ( 0) | 0 | 1.75e-05 |
| delta-rpL7' (8)        | 1488 | 8 ( 0)  | 0 | 1.80e-02 |
| AT-Alu (16)            | 1501 | 14 ( 0) | 0 | 1.22e-03 |
| Gfi-1-P21' (27)        | 1510 | 26 ( 0) | 0 | 1.45e-10 |
| HiNF-A_RS (12)         | 1538 | 9 ( 0)  | 0 | 1.80e-02 |
| YY1_CS' (9)            | 1558 | 7 ( 0)  | 0 | 1.44e-01 |
| YY1_CS4 (11)           | 1559 | 9 ( 0)  | 0 | 1.00e00  |
| PAI-2-CRE-element (8)  | 1560 | 8 ( 0)  | 0 | 1.80e-02 |
| TSE/TRE/DR4_(1)' (16)  | 1560 | 12 ( 0) | 0 | 1.56e-01 |
| ESE-3_CS (9)           | 1587 | 8 ( 0)  | 0 | 1.80e-02 |
| Ets1-Fgf8 (8)          | 1587 | 8 ( 0)  | 0 | 1.80e-02 |
| c-Ets-2_CS' (8)        | 1587 | 7 ( 0)  | 0 | 7.18e-02 |
| SREBP-1_CS (9)         | 1594 | 7 ( 0)  | 0 | 1.44e-01 |
| AP-2-p62_(1)' (8)      | 1614 | 8 ( 0)  | 0 | 1.80e-02 |
| Gfi-1-AZU-1 (30)       | 1617 | 29 ( 0) | 0 | 2.27e-12 |
| Gfi-1-ACT' (30)        | 1618 | 28 ( 0) | 0 | 2.51e-09 |
| LUN_RS' (16)           | 1618 | 16 ( 0) | 0 | 2.74e-07 |
| PLOD1-Bic-NKE' (15)    | 1622 | 14 ( 0) | 0 | 2.43e-03 |
| HIOMT-A-E4 (18)        | 1625 | 17 ( 0) | 0 | 3.80e-05 |
| bicoid-CAMLG (8)       | 1631 | 8 ( 0)  | 0 | 1.80e-02 |
| C/EBP-TTRS3' (8)       | 1643 | 8 ( 0)  | 0 | 1.80e-02 |
| C/EBP_CS2' (8)         | 1643 | 7 ( 0)  | 0 | 7.18e-02 |
| TTF-1-SP-D (11)        | 1642 | 10 ( 0) | 0 | 6.23e-01 |
| E47-MyoD_CS' (8)       | 1646 | 7 ( 0)  | 0 | 5.39e-02 |
| MT-IG-MRE-b' (13)      | 1651 | 12 ( 0) | 0 | 3.90e-02 |
| GABP-Slp_site' (8)     | 1659 | 8 ( 0)  | 0 | 1.80e-02 |

|                       |      |         |   |          |
|-----------------------|------|---------|---|----------|
| Elk-1_CS (8)          | 1661 | 7 ( 0)  | 0 | 7.18e-02 |
| IL2R-Ets (8)          | 1661 | 8 ( 0)  | 0 | 1.80e-02 |
| Initiator_CS' (8)     | 1677 | 7 ( 0)  | 0 | 7.18e-02 |
| Initiator_CS' (8)     | 1717 | 7 ( 0)  | 0 | 7.18e-02 |
| crystallin-DE1A' (11) | 1728 | 10 ( 0) | 0 | 6.23e-01 |
| dc_box.2 (10)         | 1745 | 9 ( 0)  | 0 | 4.49e-03 |
| Ig_cd' (10)           | 1745 | 9 ( 0)  | 0 | 4.49e-03 |
| dc_box (10)           | 1745 | 9 ( 0)  | 0 | 4.49e-03 |
| Ig-dc.2 (10)          | 1745 | 9 ( 0)  | 0 | 2.24e-03 |
| dc_element_CS (10)    | 1745 | 9 ( 0)  | 0 | 4.49e-03 |
| cd_element_CS' (10)   | 1745 | 9 ( 0)  | 0 | 4.49e-03 |
| Oct-X_CS' (9)         | 1747 | 7 ( 0)  | 0 | 4.49e-03 |
| OTF-2A_RS' (9)        | 1747 | 9 ( 0)  | 0 | 4.49e-03 |
| OTF-1_RS' (9)         | 1747 | 9 ( 0)  | 0 | 4.49e-03 |
| Ig-kappa.2 (8)        | 1747 | 8 ( 0)  | 0 | 1.80e-02 |
| Octa-U2snRNA' (8)     | 1747 | 8 ( 0)  | 0 | 1.80e-02 |
| NF-A2-IgkLc (8)       | 1747 | 8 ( 0)  | 0 | 1.80e-02 |
| NF-A1-IgkLc (8)       | 1747 | 8 ( 0)  | 0 | 1.80e-02 |
| IgNF-A-Igk (8)        | 1747 | 8 ( 0)  | 0 | 1.80e-02 |
| IgHC.16 (8)           | 1747 | 8 ( 0)  | 0 | 1.80e-02 |
| IgHC.15 (8)           | 1747 | 8 ( 0)  | 0 | 1.80e-02 |
| IgHC.14 (8)           | 1747 | 8 ( 0)  | 0 | 1.80e-02 |
| IgNF-A-IgH_(2)' (8)   | 1747 | 8 ( 0)  | 0 | 1.80e-02 |
| IgHC.2 (8)            | 1747 | 8 ( 0)  | 0 | 1.80e-02 |
| NF-A2-IgHC (8)        | 1747 | 8 ( 0)  | 0 | 1.80e-02 |
| NF-A1-IgHC (8)        | 1747 | 8 ( 0)  | 0 | 1.80e-02 |
| IgHC.1 (8)            | 1747 | 8 ( 0)  | 0 | 1.80e-02 |
| IgNF-A-IgH_(1) (8)    | 1747 | 8 ( 0)  | 0 | 1.80e-02 |
| histone-H2B-US (8)    | 1747 | 8 ( 0)  | 0 | 1.80e-02 |
| OCTA3' (8)            | 1747 | 8 ( 0)  | 0 | 1.80e-02 |
| OCTA1.1 (8)           | 1747 | 8 ( 0)  | 0 | 1.80e-02 |
| IRF-2_RS' (8)         | 1758 | 6 ( 0)  | 0 | 2.87e-01 |
| STE6.2 (8)            | 1762 | 8 ( 0)  | 0 | 1.80e-02 |
| CK-8-mer (8)          | 1770 | 7 ( 0)  | 0 | 7.18e-02 |
| RIPE3b' (8)           | 1782 | 8 ( 0)  | 0 | 1.80e-02 |
| Ets1-erk1' (8)        | 1812 | 8 ( 0)  | 0 | 1.80e-02 |
| TCF-1alpha-ADA (11)   | 1866 | 10 ( 0) | 0 | 6.23e-01 |
| AP-2-cyclinD2_(1) (8) | 1866 | 8 ( 0)  | 0 | 1.80e-02 |

|                     |      |        |   |           |
|---------------------|------|--------|---|-----------|
| AP-2-erk1 (9)       | 1889 | 9 ( 0) | 0 | 4. 49e-03 |
| C/EBP-beta_CS (9)   | 1917 | 7 ( 0) | 0 | 2. 87e-01 |
| Math3-E-box (8)     | 1942 | 8 ( 0) | 0 | 1. 80e-02 |
| CP2-consensus' (11) | 1965 | 8 ( 0) | 0 | 7. 18e-02 |
| CK-8-mer (8)        | 1972 | 7 ( 0) | 0 | 7. 18e-02 |
| keratinocyte_CS (8) | 1972 | 7 ( 0) | 0 | 3. 59e-02 |
| MEIS1_CS' (8)       | 1979 | 7 ( 0) | 0 | 1. 44e-01 |
| Oct-1-IE-3_ (3) (9) | 2075 | 9 ( 0) | 0 | 4. 49e-03 |
| AP-2-TBXAS1 (8)     | 2110 | 8 ( 0) | 0 | 1. 80e-02 |

---

Table S2. List of oligo primers used in this study

| Primer name | Sequence (5'→3')                                   | Used in plasmid construction |
|-------------|----------------------------------------------------|------------------------------|
| hE-1p-2.1F  | TTCTCTATCGATAACGCGTTTGCTCCTGACCTAAAATTCCATTAATGGG  | pE2.1p                       |
| hE-1p-2.1R  | CGAGCCCGGGCTAGCAAGCTTGGTGCCAGTTGGAGGCCAAAAAGG      | pE2.1p                       |
| F1          | GCAGTGAGCCGAGATTGCCCTAGGCTTGTCCTTCT                | pE2.1p-d1350/1250            |
| R1          | ATCTCGAGTTTTCTGCCCATGCGCCAGGT                      | pE2.1p-d1350/1250            |
| F2          | AAGGTACCGGAGTCATCCTTAAGTGTCTTCCCAGC                | pE2.1p-d1350/1250            |
| R2          | GACAAGCCTAGGGCAATCTCGGCTCACTGCAACCT                | pE2.1p-d1350/1250            |
| F3          | AAGGTACCGGAGTCATCCTTAAGTGTCT                       | pE2.1p-d1485/1350            |
| R3          | GGCTGGATGCAGCAGTGTGACCTGATCTCAAAGTCTTGA            | pE2.1p-d1485/1350            |
| F4          | TCAAGAGTTTGAGATCAGGTCACACTGCTGCACTCCAGCC           | pE2.1p-d1485/1350            |
| R4          | AAAGGCCTCTTAAAGGCAGCCGAAGGC                        | pE2.1p-d1485/1350            |
| F5          | AAGGTACCGGAGTCATCCTTAAGTGTCT                       | pE2.1p-d1649/1486            |
| R5          | CCAATGGCTGCTTCATTTGCAT                             | pE2.1p-d1649/1486            |
| F6          | TCAGAGACACGTTTATTCTGCTCTTACTCA                     | pE2.1p-d1749/1650            |
| R6          | ATCTCGAGTTTTCTGCCCATGC                             | pE2.1p-d1749/1650            |
| F7          | AAGGTACCGGAGTCATCCTTAAGTGTCTTCC                    | pE2.1p-d1749/1650            |
| R7          | TGAGTAAGAGCAGAATAAACGTGTCTCTGACTCCT                | pE2.1p-d1749/1650            |
| F8          | GCACTTGGAAGGGATGTGGTGCCAACCCAGGGAG                 | pE2.1p-d1850/1750            |
| R8          | ATCTCGAGTTTTCTGCCCATGCGCCAGGTTGAACAGTTGCTGGTGGGTTA | pE2.1p-d1850/1750            |
| F9          | GGAACCGGAGTCATCCTTAAGTGTCTTCC                      | pE2.1p-d1850/1750            |
| R9          | TGGGTTGGCACCACATCCCTTCCAAGTGTCAGCT                 | pE2.1p-d1850/1750            |

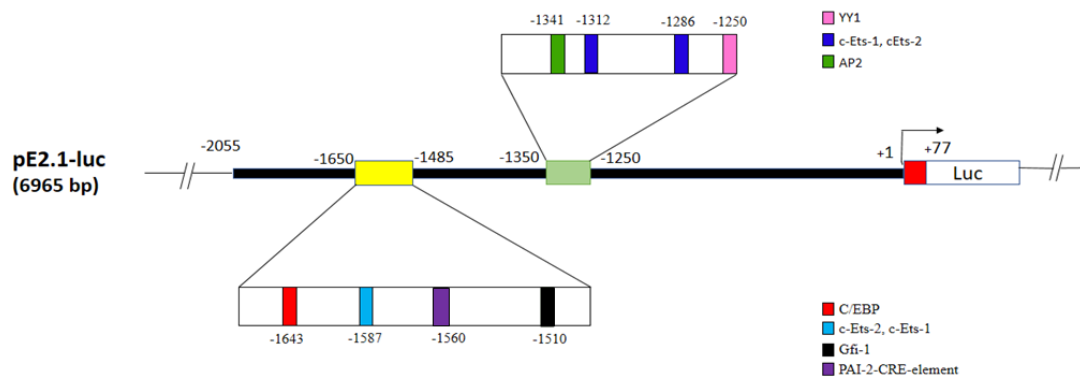

**Figure S1. TFBSs within the -1650~-1485 and -1350~-1250 segments of human *ENDOU-1* gene, as predicted using TFsitiescan.**



**A**

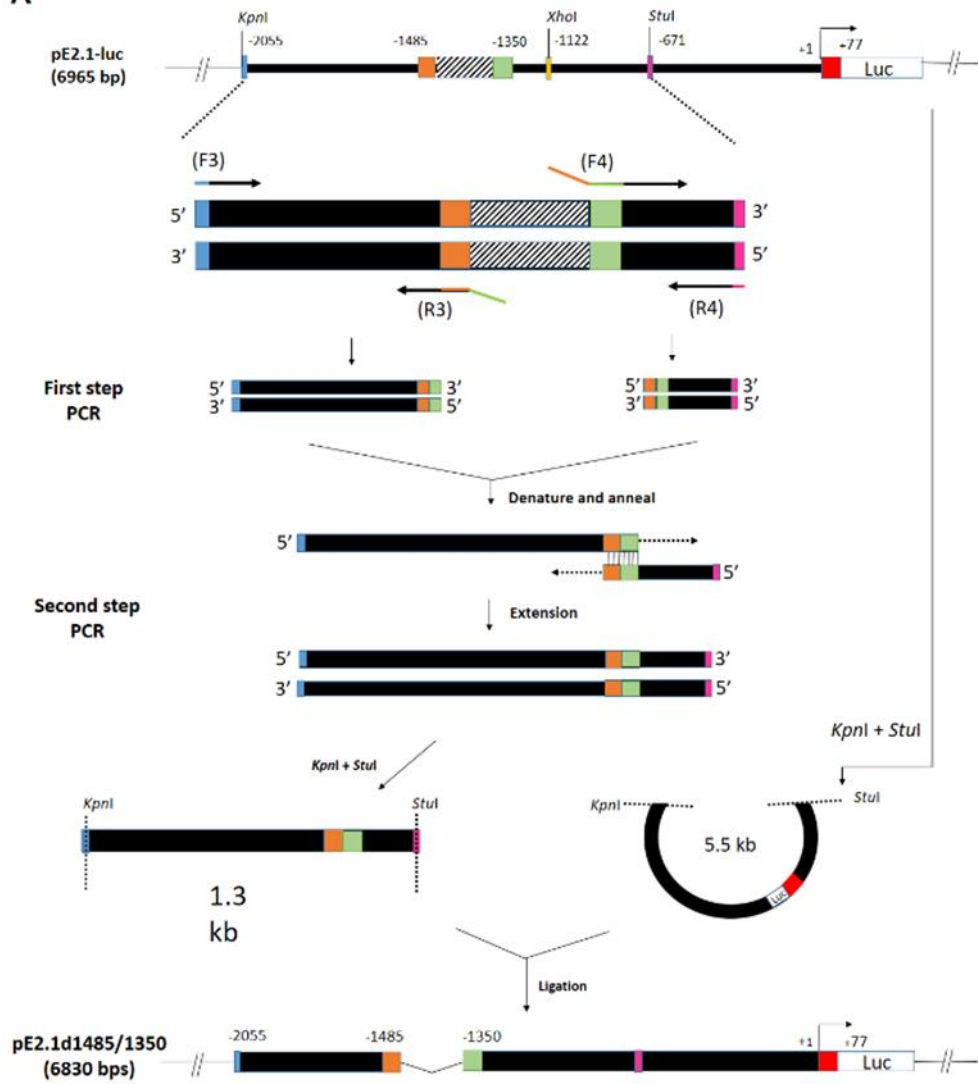

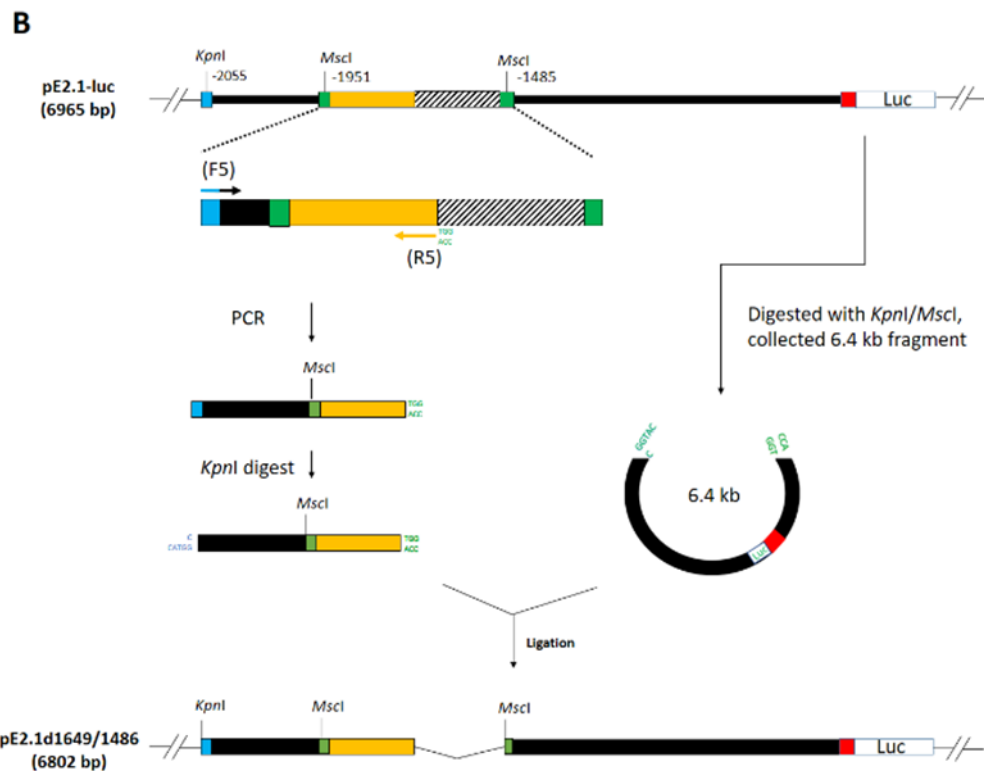

**Figure S2. Scheme of plasmid construction.** (A) Two-step PCR strategy to generate plasmids harboring various internal deletions within the pE2.1p construct. For example, pE2.1p lacking -1485~-1350 (pE2.1p-d1485/1350). Plasmids pE2.1p-d1850/1750 and pE2.1p-d1749/1650 were generated using the same strategy except of using restriction enzymes KpnI and XhoI and corresponding primers (Table 1). Similarly, pE2.1p-d1350/1250 was generated using XhoI and StuI and corresponding primers. (B) Restriction and ligation strategy to generate plasmid pE2.1p-d1649/1486. A 0.5 kb PCR product containing an internal MscI cutting site was amplified using primers F5 and R5, followed by insertion into KpnI and MscI-digested plasmid pE2.1p.
